# Supplementary material
Source: PubMed Central journal article supplement (PMC3799799)
Supplement: NIHMS501283-supplement-Suppl_Fig_2.pdf [file NIHMS501283-supplement-Suppl_Fig_2.pdf]

## Supplementary Fig. 2

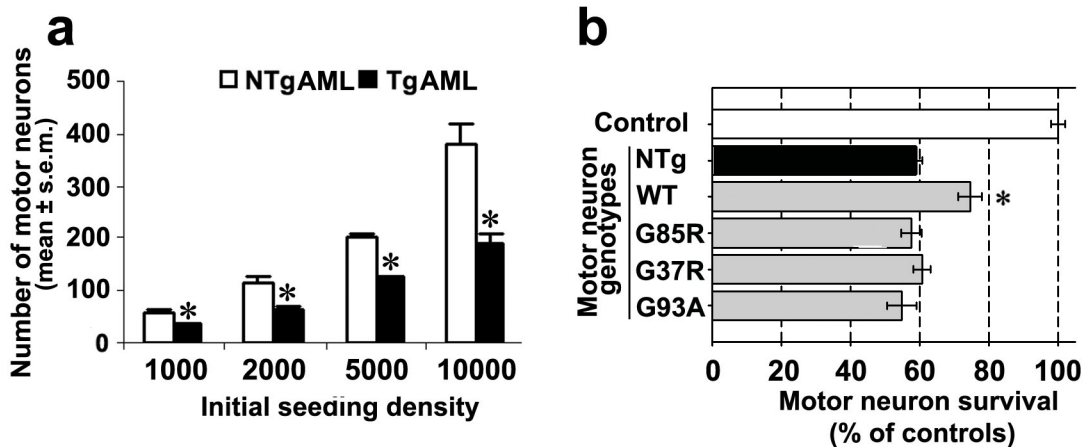

**Supplementary Fig.2:** Mutant SOD1 astrocytes kill to the same extent NTg and mutant SOD1 motor neurons. (a) At 7 d post-plating, there was consistently fewer SMI32<sup>+</sup> NTg pMN ( $P < 0.01$ ) in G93A AML co-cultures than in NTg AML co-cultures, and the magnitude of the genotypic difference was the same regardless of the initial motor neuron seeding densities. (b) At 7 d post-plating, the loss of G93A, G37R, G85R pMN and NTg pMN plated on G93A AML was similar ( $P > 0.05$ ), but it was greater ( $*P < 0.01$ ) than the loss of NTg pMN plated on NTg AML. The loss of WT pMN plated on G93A AML was smaller than that of G93A, G37R, and G85R pMN and NTg pMN plated on G93A AML and greater than that of NTg pMN plated on NTg AML control co-cultures ( $**P < 0.01$ ).
