# Supplementary material
Source: PubMed Central journal article supplement (PMC3799799)
Supplement: NIHMS501283-supplement-Suppl_Fig_5.pdf [file NIHMS501283-supplement-Suppl_Fig_5.pdf]

# Supplementary Fig.5

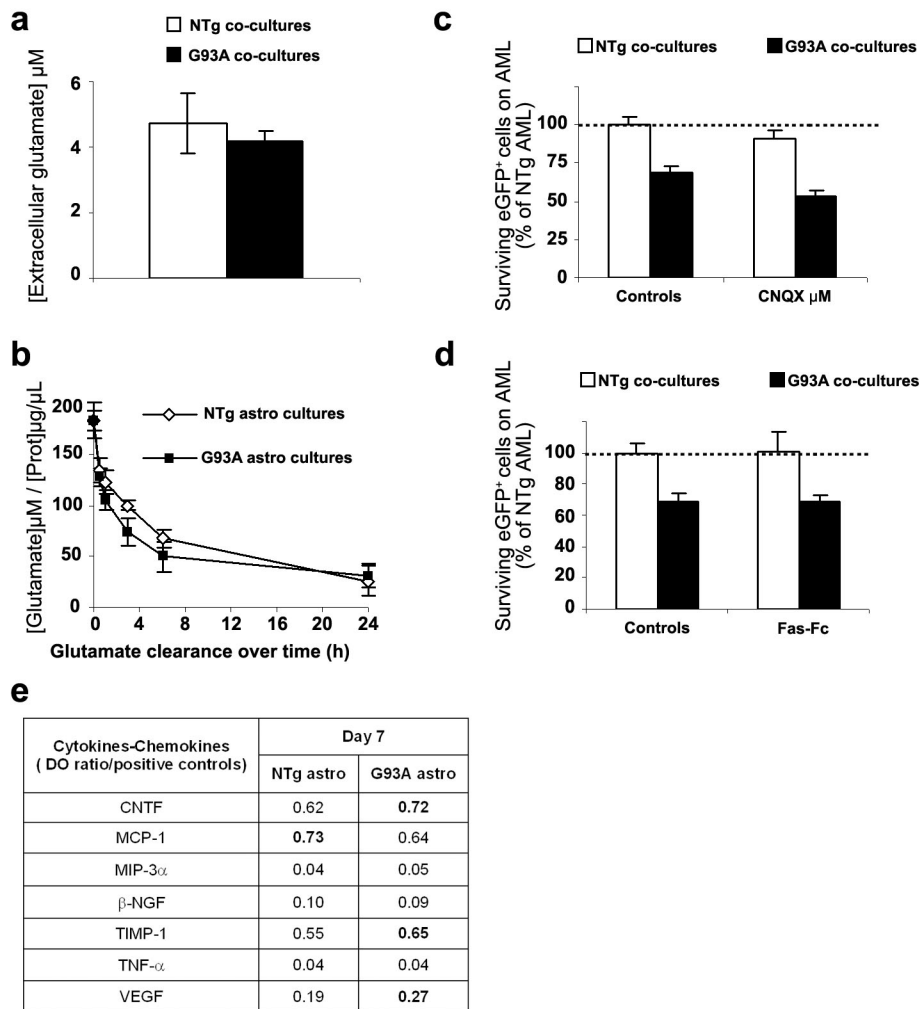

**Supplementary Fig.5:** Glutamate, Fas ligand and several major cytokines and chemokines are not involved in the toxicity of mutant SOD1 astrocytes to motor neurons. (a) Extracellular glutamate concentrations measurement by HPLC at 7 d post-plating in co-cultures made of <sup>NTg</sup>pMN plated on <sup>NTg</sup>AML or <sup>G93A</sup>AML did not differ (Student t-test; P=1.0). (b) 14 d-old confluent <sup>NTg</sup>AML or <sup>G93A</sup>AML were incubated with 200  $\mu\text{M}$  of glutamate. Then, the extracellular concentration of glutamate was monitored by HPLC at 0, 0.5, 1, 3, 6 and 24 hr. No interaction was found between the timing of glutamate decrease in the medium and the genotypes of the two astrocyte layers ( $F_{[2,24]} = 0.430$ ;  $P=0.826$ ; ANOVA). (c) Application of 100  $\mu\text{M}$  of CNQX, a potent AMPA/kainite receptor antagonist, did not influence mutant SOD1 astrocyte-mediated motor neuron death. (d) Incubation of the co-cultures with 1  $\mu\text{g}/\text{mL}$  of Fas-Fc, the inhibitor of soluble Fas ligand, did not improve motor neuron survival on mutant astrocyte layer. (e) The relative contents of 19 cytokines/chemokines were screened by array in CMd from G93A and NTg astrocytes. Only, the 7 molecules with detectable quantities were reported in the table. The genotypic differences were highlighted in bold. The other 12 screened molecules with undetectable levels were: CINC-2/3, Fractalkine, GM-CSF, IL-1 $\alpha$ /1 $\beta$ /4/6/10, IFN- $\gamma$ , LIX, and Leptin.
