# Supplementary material
Source: PubMed Central journal article supplement (PMC3799799)
Supplement: NIHMS501283-supplement-Suppl_Fig_6.pdf [file NIHMS501283-supplement-Suppl_Fig_6.pdf]

# Supplementary Fig.6

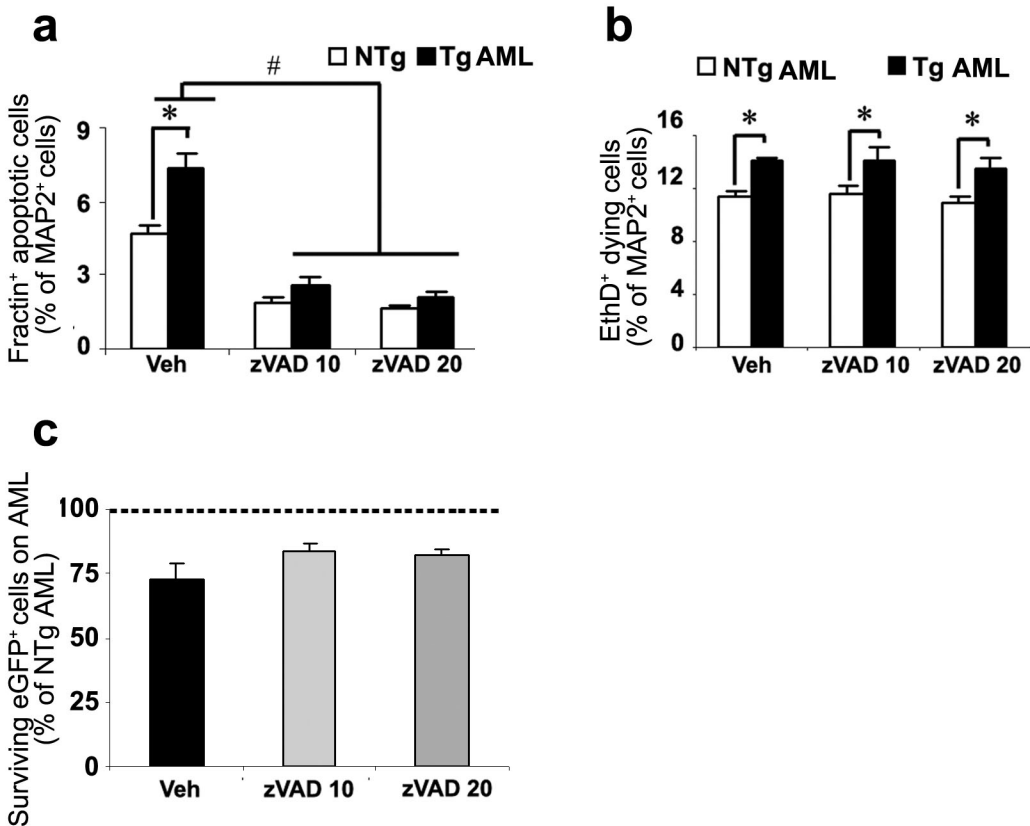

**Supplementary Fig.6:** Mutant SOD1–expressing astrocytes kill motor neurons through a programmed cell death which can be caspase–independent. (a–c) At 7 d post–plating, the caspase inhibitor zVAD.fmk decreased ( $P < 0.01$ ) the percentage of embryonic stem cell–derived MAP2<sup>+</sup>/fractin<sup>+</sup> neurons (a), but had no effect on the percentage of embryonic stem cell–derived MAP2<sup>+</sup> neurons labeled with EthD (b) or of surviving ESMN (c). \*Higher ( $p < 0.01$ ) than <sup>NTg</sup>AML co–cultures; †lower ( $p < 0.001$ ) than vehicle (veh; DMSO). Values are means  $\pm$  sem for 4–6 experiments per group and all the above statistics refer to ANOVA followed by a Newman–Keuls post–hoc testing.
